# Supplementary material for: Developing a chitosan supported imidazole Schiff-base for high-efficiency gene delivery
Source: Royal Society of Chemistry journal article supplement (doi:10.1039/c2py20494k), 2012-10-11
Supplement: c2py20494k.pdf [file c2py20494k.pdf]

## Supporting Information

### **Developing a Chitosan Supported Imidazole Schiff-base for High-Efficiency Gene Delivery**

Bingyang Shi, Hu Zhang, Zheyu Shen, Jingxiu Bi\* and Sheng Dai \*

*School of Chemical Engineering, The University of Adelaide, Adelaide, SA 5005,  
Australia*

\* Corresponding authors

E-mail: s.dai@adelaide.edu.au (SD) and jingxiu.bi@adelaide.edu.au (JB)

- Figure S1.** Calibration curve of imidazole groups at the wavelength of 257 nm.
- Figure S2.** UV absorption of the synthesized CISB polymers.
- Figure S3.** Comparison on the FTIR spectra of chitosan and CISBs.
- Figure S4.** The  $^1\text{H-NMR}$  of the CISB-2 in  $\text{D}_2\text{O}$ .
- Figure S5.** SEM image of CISB-2/pDNA polyplexes at the mixing weight ratios of 10 (polymer to pDNA).
- Figure S6.** Gene transfection efficiency of the CISB-2 against the 293 cells measured by flow cytometer at the pDNA concentration of  $1\ \mu\text{g}/\text{well}$  in a 24-well plate using naked DNA as a negative control, chitosan and lipofectamine2000 as the positive control.
- Figure S7.** Comparison on the buffer capacity of various polymers.
- Figure S8.** Gene transfection efficiency of the CISB-2 against the 293T cells measured by flow cytometer at the pDNA concentrations of 0.5, 2.0 and  $5.0\ \mu\text{g}/\text{well}$  in 24-well plates.

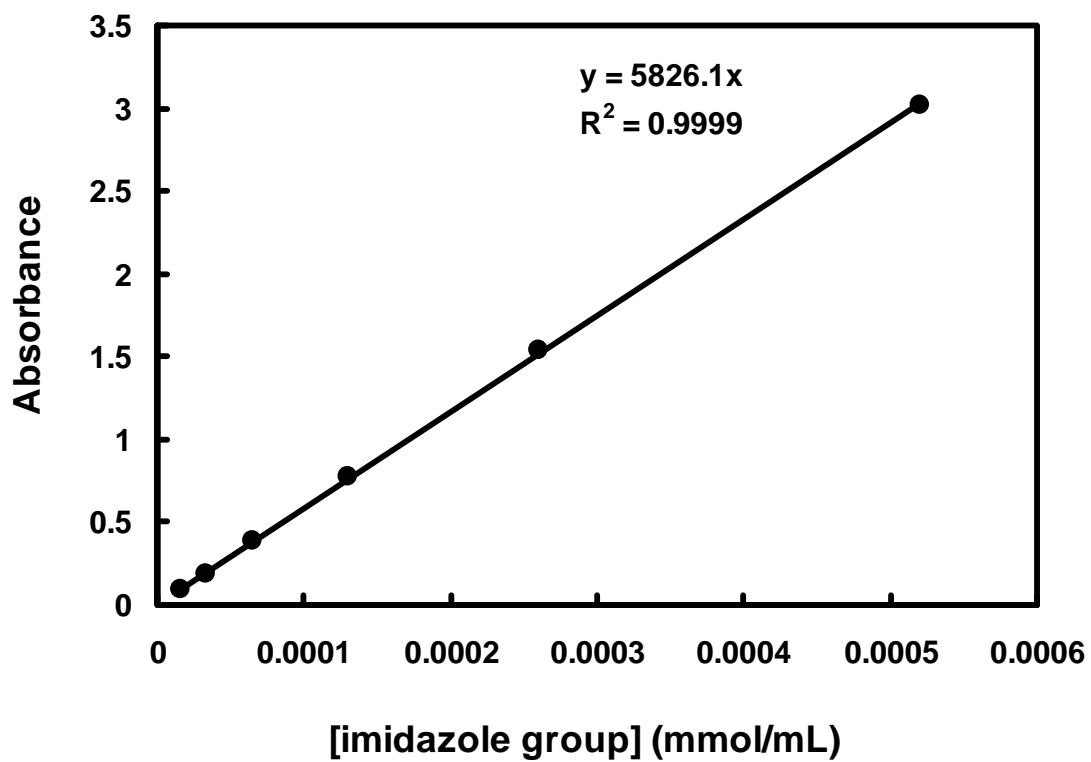

**Figure S1.** Calibration curve of imidazole groups at the wavelength of 257 nm.

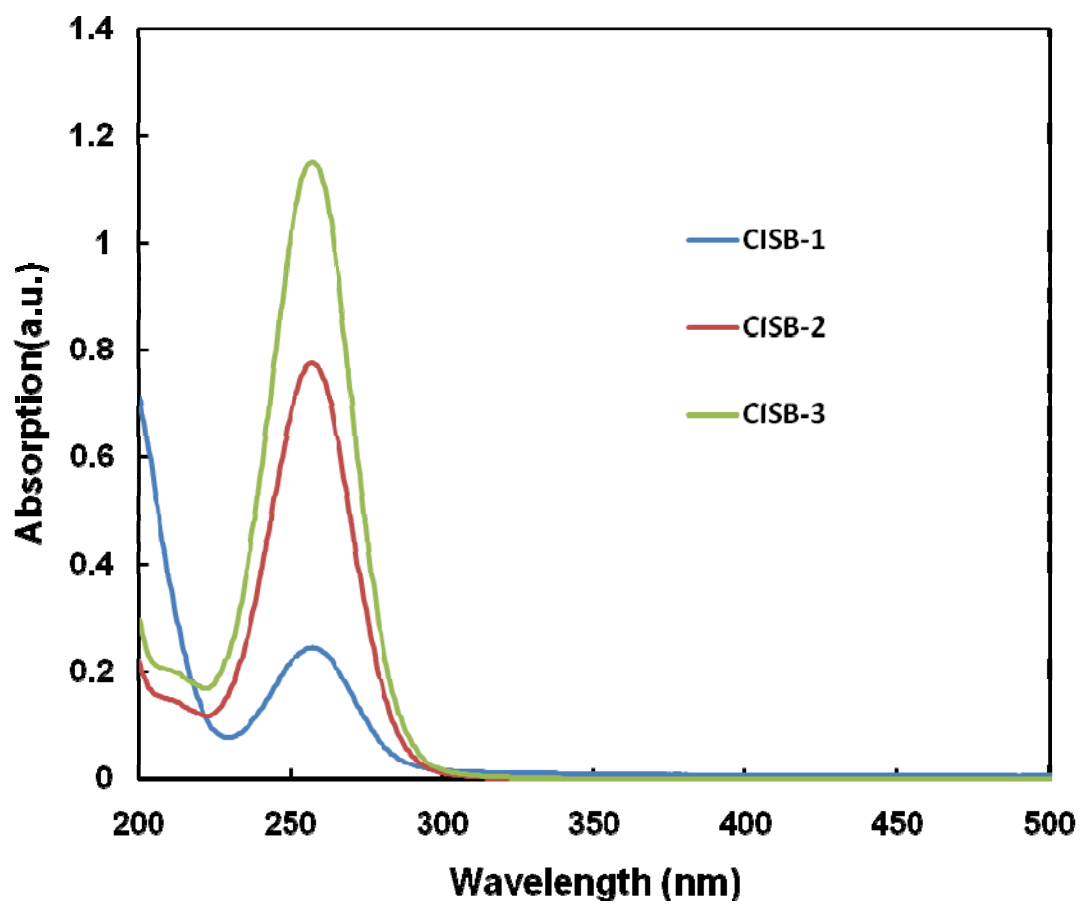

**Figure S2.** UV absorption of the synthesized CISB polymers.

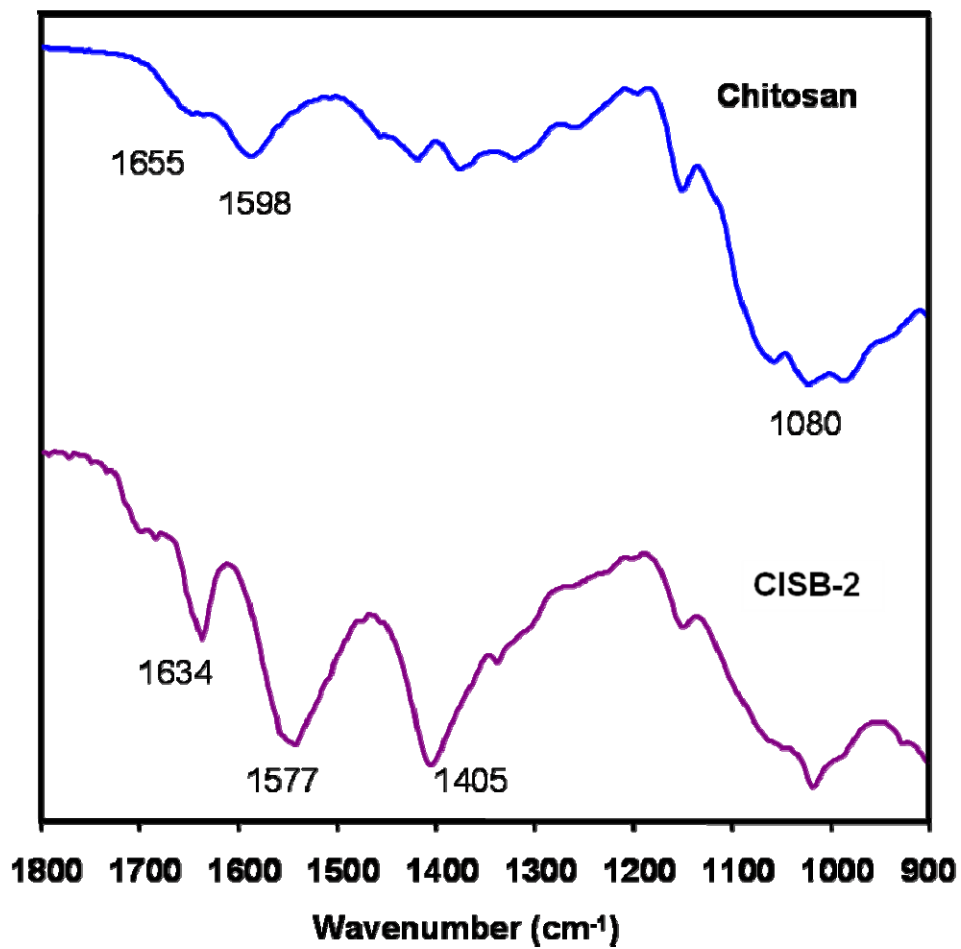

**Figure S3.** Comparison on the FTIR spectra of chitosan and CISBs.

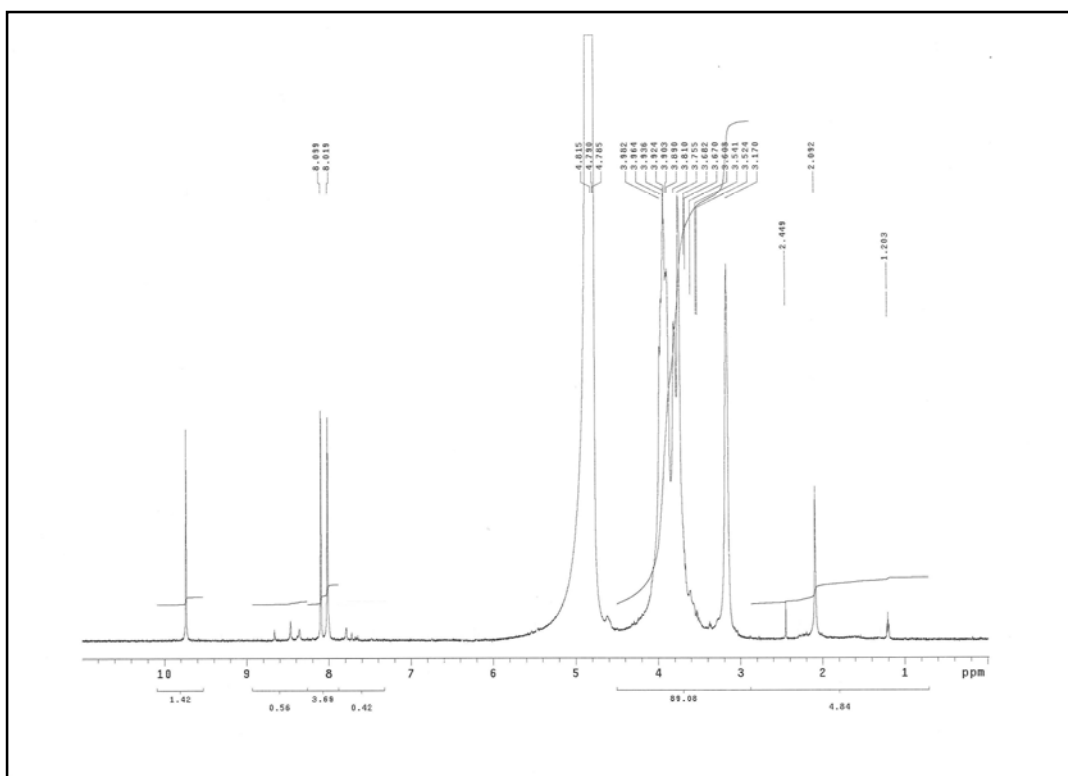

**Figure S4.** The  $^1\text{H-NMR}$  of the CISB-2 in  $\text{D}_2\text{O}$ .

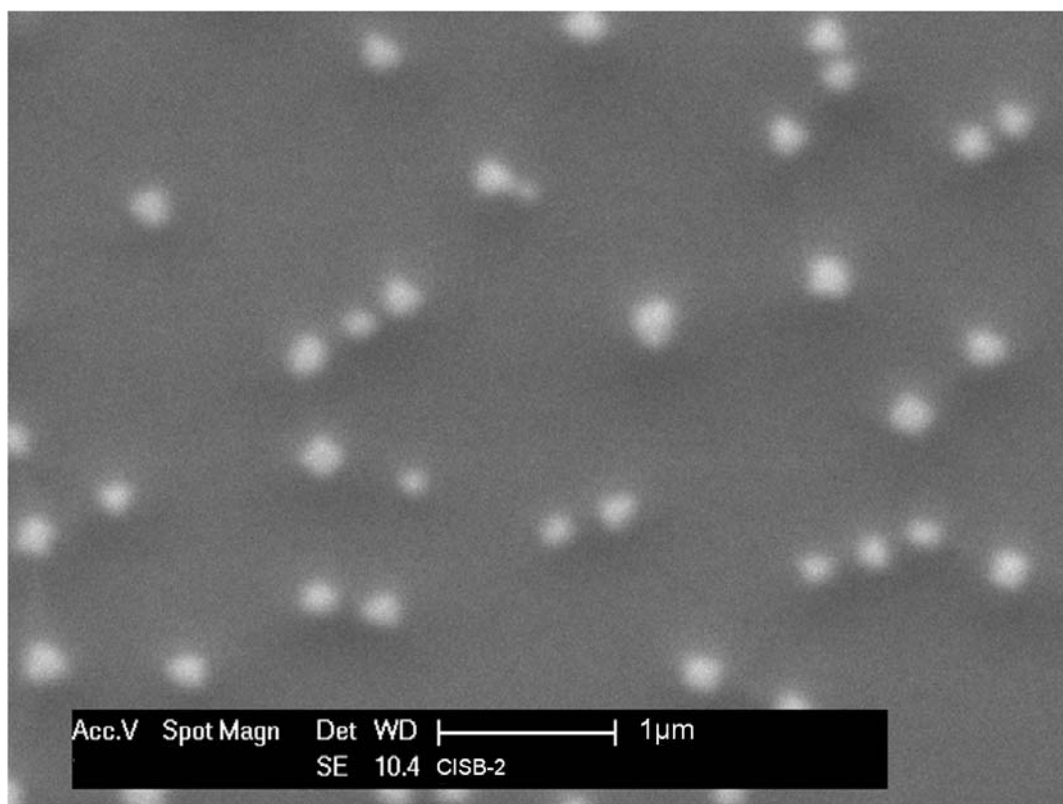

**Figure S5.** SEM image of CISB-2/pDNA polyplexes at the mixing weigh ratios of 10 (polymer to pDNA).

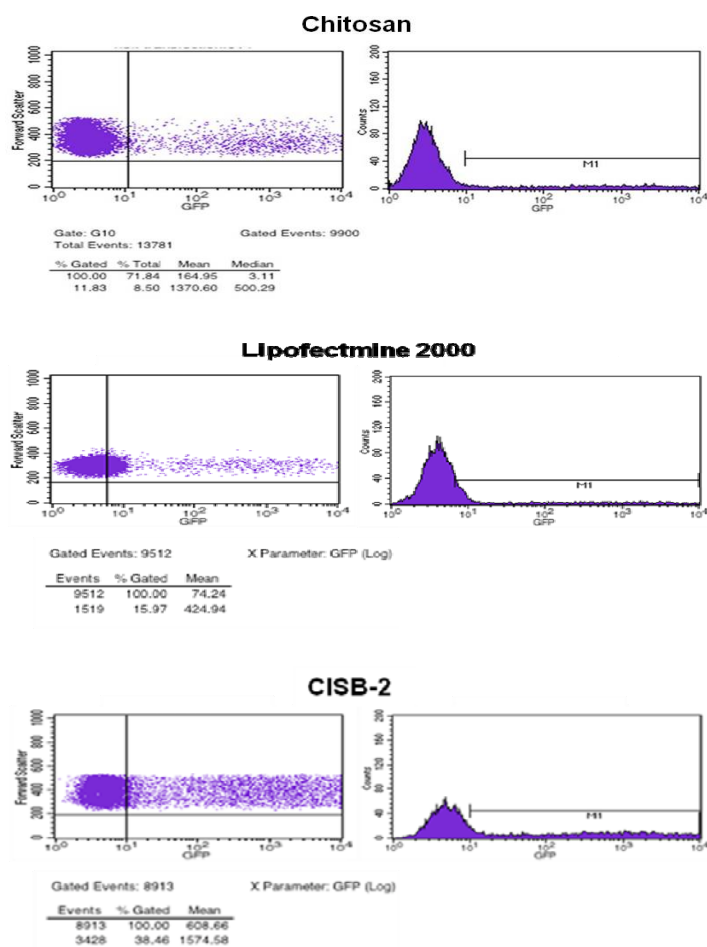

**Figure S6.** Gene transfection efficiency of the CISB-2 against the 293 cells measured by flow cytometer at the pDNA concentration of 1  $\mu$ g/well in a 24-well plate using naked DNA as a negative control, Chitosan and lipofectamine 2000 as the positive control.



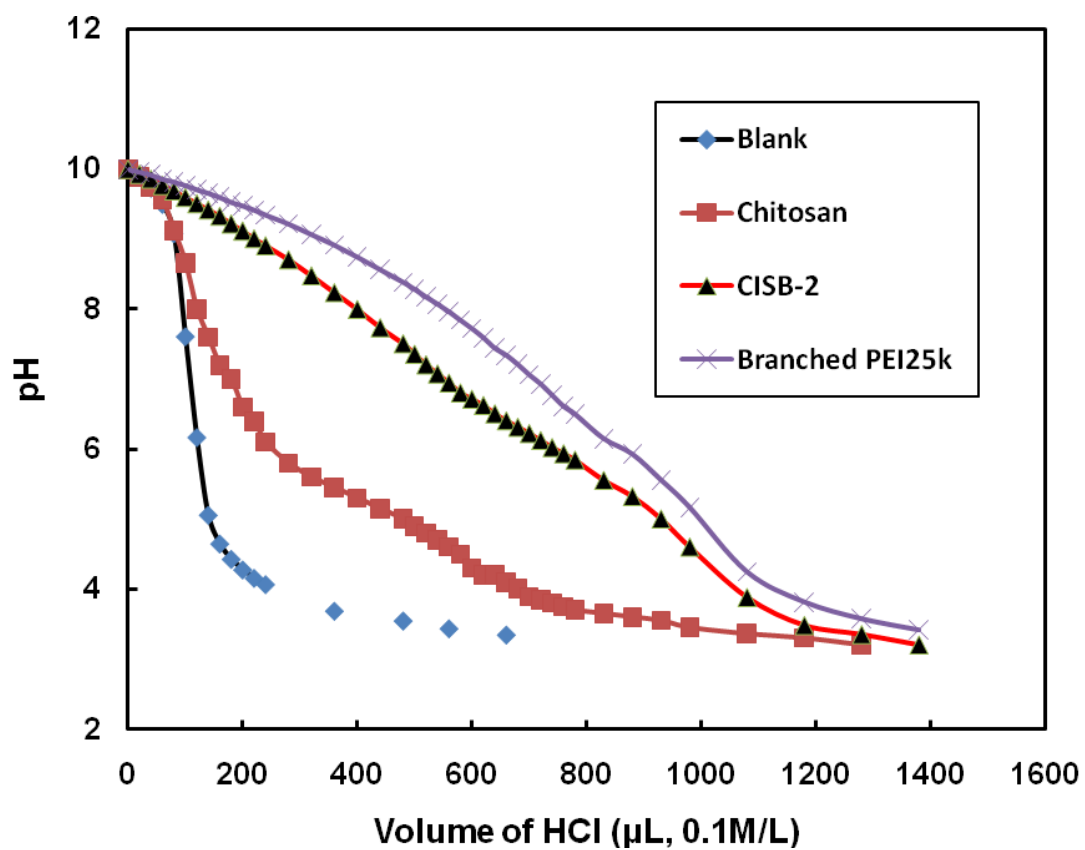

**Figure S7.** Comparison on the buffering capacity of various polymers.

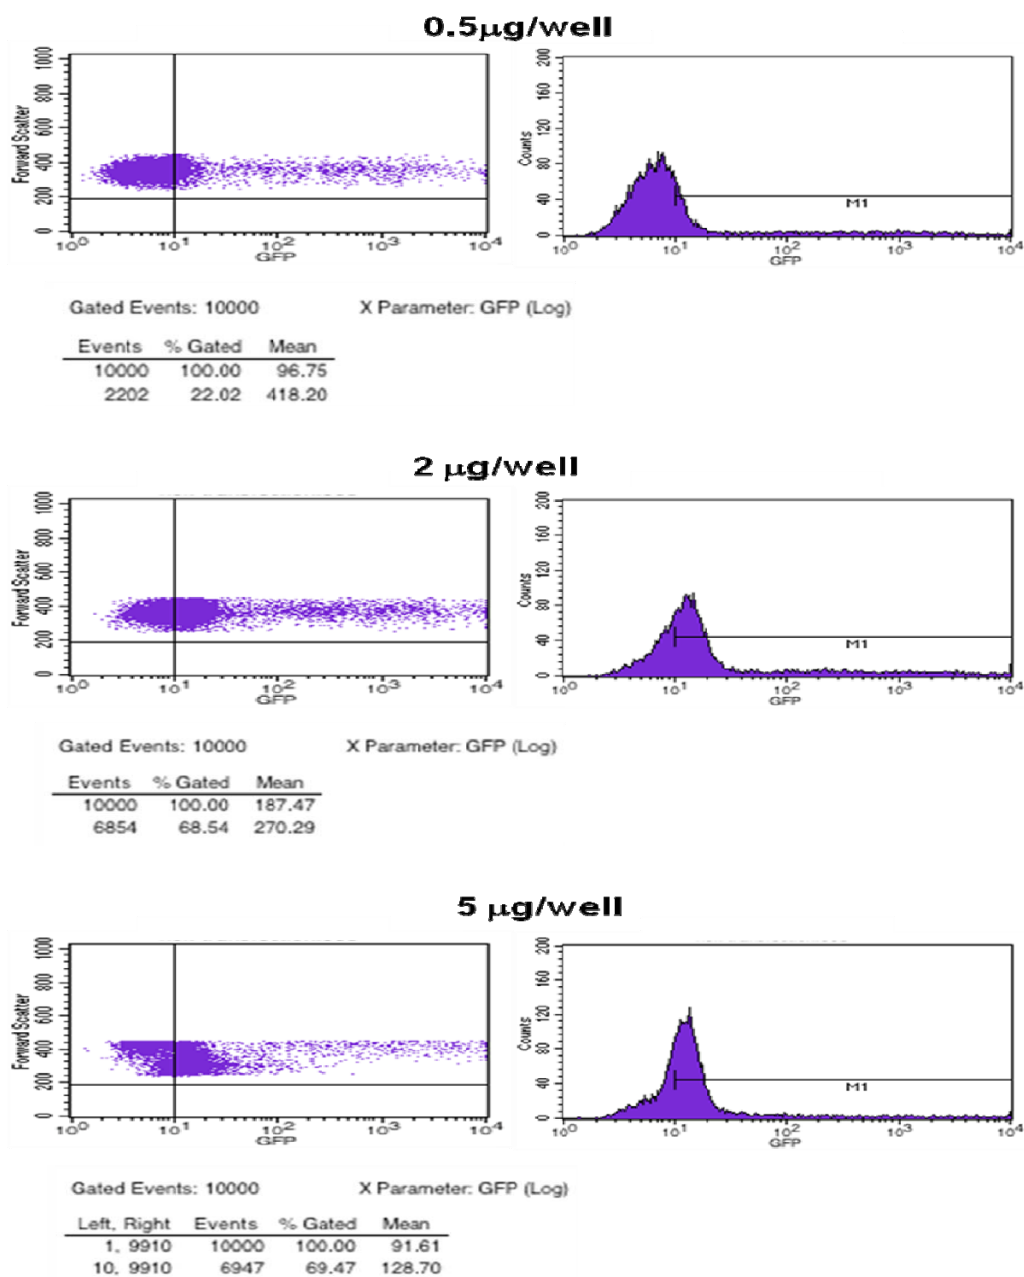

**Figure S8.** Gene transfection efficiency of the CISB-2 against the 293T cells measured by flow cytometer at the pDNA concentrations of 0.5, 2.0 and 5.0  $\mu\text{g}/\text{well}$  in 24-well plates.
